# Supplementary material
Source: PubMed Central journal article supplement (PMC7211738)
Supplement: mmc1.pdf [file mmc1.pdf]

# **SARS-CoV-2 infection of the liver directly contributes to hepatic impairment in patients with COVID-19**

Yijin Wang, Shuhong Liu, Hongyang Liu, Wei Li, Fang Lin, Lina Jiang, Xi Li, Pengfei Xu, Lixin Zhang, Lihua Zhao, Yun Cao, Jiarui Kang, Jianfa Yang, Ling Li, Xiaoyan Liu, Yan Li, Ruifang Nie, Jinsong Mu, Fengmin Lu, Shousong Zhao, Jiangyang Lu, Jingmin Zhao

Table of contents

|               |   |
|---------------|---|
| Table S1..... | 2 |
|---------------|---|

**Table S1. Liver function tests and medications of intensive care units patients**

| Number | ITU/HDU                | ALT<br>5-40<br>(U/L) | AST<br>5-40<br>(U/L) | DBiL<br>0-6.8<br>(μmol/L) | Album<br>35-55<br>(g/L) | ALP<br>40-150<br>(U/L) | GGT<br>11-50<br>(U/L) | PT<br>10.2-14.3<br>(sec) | INR<br>0.8-1.2 | Medications                                                     |                                                                                                                                                                                                   |                                                                                     |                                                                                                                                                                                                                                                                                                                                                                                                                                     |
|--------|------------------------|----------------------|----------------------|---------------------------|-------------------------|------------------------|-----------------------|--------------------------|----------------|-----------------------------------------------------------------|---------------------------------------------------------------------------------------------------------------------------------------------------------------------------------------------------|-------------------------------------------------------------------------------------|-------------------------------------------------------------------------------------------------------------------------------------------------------------------------------------------------------------------------------------------------------------------------------------------------------------------------------------------------------------------------------------------------------------------------------------|
|        |                        |                      |                      |                           |                         |                        |                       |                          |                | Antiviral<br>treatment                                          | Antibiotic<br>treatment                                                                                                                                                                           | corticosteroid                                                                      | Others                                                                                                                                                                                                                                                                                                                                                                                                                              |
| 1      | Septic shock           | 26                   | 52                   | 11.2                      | 33                      | 55                     | 14                    | 12                       | 1.04           | Lopinavir/Ritonavir/<br>PEG-Interferon α2b<br>/sulbactam sodium | Piperacillin/<br>Moxifloxacin/Meropenem/Van<br>comycin<br>hydrochloride/Linezolid/Tigecy<br>cline/Polymyxomycin sulfate<br>B/Imipenem and cilastatin<br>sodium/Cefoperazone/Tazobac<br>tam sodium | Methylprednisolo<br>ne/Hydrocortison<br>e sodium<br>succinate                       | Intravenous<br>immunoglobulin<br>therapy/Omeprazole<br>sodium/Nadroparin<br>calcium/Carpofennetacetat<br>e/Somatostatin/Protamine<br>sulfate/Carrol sodium<br>sulfonate sodium<br>chloride/Lyophilizing<br>thrombin powder/Human<br>fibrinogen/Human<br>prothrombin complex/Low<br>molecular weight heparin<br>calcium/Dobutamine<br>hydrochloride/Deslanoside/<br>Thymalfasin/Digoxin/Norepi<br>nephrine/Ambroxol<br>hydrochloride |
| 2      | Acute kidney<br>injury | 16                   | 34                   | 12.4                      | 32                      | 48                     | 16                    | 14.5                     | 1.27           | PEG-Interferon α2b<br>/Lopinavir/Ritonavir                      | Moxifloxacin/Meropenem/Line<br>zolid/Piperacillin/Tazobactam<br>sodium                                                                                                                            | Methylprednisolo<br>ne                                                              | Intravenous<br>immunoglobulin therapy<br>/Carpofennet acetate                                                                                                                                                                                                                                                                                                                                                                       |
| 3      | ARDS                   | 47                   | 33                   | 6.2                       | 28                      | 36                     | 35                    | 11.6                     | 1.01           | PEG-Interferon<br>α2b/Lopinavir/Riton<br>avir                   | Moxifloxacin/Piperacillin/<br>Tazobactam sodium                                                                                                                                                   | Methylprednisolo<br>ne                                                              | Ambroxol hydrochloride/<br>Omeprazole sodium                                                                                                                                                                                                                                                                                                                                                                                        |
| 4      | ARDS                   | 597                  | 1471                 | 3.1                       | 26                      | 99                     | 55                    | 17.7                     | 1.56           | Lopinavir/Ritonavir                                             | Vancomycin<br>hydrochloride/Linezolid/Merop<br>enem/Vancomycin<br>hydrochloride                                                                                                                   |                                                                                     | Ambroxol<br>hydrochloride/Carpofennet<br>acetate/Intravenous<br>immunoglobulin therapy                                                                                                                                                                                                                                                                                                                                              |
| 5      | Uremia                 | 33.6                 | 66                   | 21.9                      | 38                      | 266                    | 193                   | 11.9                     | 1.04           | PEG-Interferon<br>α2b/Arbidol                                   | Meropenem/Caspofungin/Line<br>zolid                                                                                                                                                               | Methylprednisolo<br>ne                                                              | Intravenous<br>immunoglobulin therapy                                                                                                                                                                                                                                                                                                                                                                                               |
| 6      | ARDS                   | 87                   | 134                  | 4.5                       | 29                      | 86                     | 89                    | 13.6                     | 1.19           | PEG-Interferon<br>α2b/Arbidol                                   | Piperacillin/Tazobactam<br>sodium/Azithromycin                                                                                                                                                    | Methylprednisolo<br>ne                                                              | Intravenous<br>immunoglobulin<br>therapy/Omeprazole<br>sodium/Ambroxol<br>hydrochloride/Low<br>molecular weight heparin<br>calcium/Pitavastatin                                                                                                                                                                                                                                                                                     |
| 7      | ARDS                   | 105                  | 30                   | 9.2                       | 28                      | 43                     | 81                    | 11.7                     | 1.02           | PEG-Interferon<br>α2b/sulbactam<br>sodium                       | Piperacillin/Tazobactam<br>sodium/Cefoperazone                                                                                                                                                    | Methylprednisolo<br>ne/Dexamethason<br>e sodium<br>phosphate/Predni<br>sone acetate | Lopinavir/Ritonavir/Lianhua<br>Qingwen/Omeprazole<br>sodium                                                                                                                                                                                                                                                                                                                                                                         |

|          |      |    |    |      |      |     |     |      |      |                    |                                          |
|----------|------|----|----|------|------|-----|-----|------|------|--------------------|------------------------------------------|
| <b>8</b> | ARDS | 43 | 58 | 21.7 | 22.6 | 111 | 53  | 16.1 | 1.39 | Interferon/Arbidol | Moxifloxacin                             |
| <b>9</b> | ARDS | 22 | 24 | 28.4 | 31.2 | 88  | 104 | 13.5 | 1.23 | Interferon/Arbidol | Linezolid/Imipenem and cilastatin sodium |
