# Supplementary material
Source: PubMed Central journal article supplement (PMC7211738)
Supplement: mmc2.pdf [file mmc2.pdf]

## Journal of Hepatology

### CTAT methods

Tables for a “Complete, Transparent, Accurate and Timely account” (CTAT) are now mandatory for all revised submissions. The aim is to enhance the reproducibility of methods.

- Only include the parts relevant to your study
- Refer to the CTAT in the main text as ‘Supplementary CTAT Table’
- Do not add subheadings
- Add as many rows as needed to include all information
- Only include one item per row

**If the CTAT form is not relevant to your study, please outline the reasons why:**

|  |
|--|
|  |
|--|

#### 1.1 Antibodies

| Name | Citation | Supplier                              | Cat no.  | Clone no. |
|------|----------|---------------------------------------|----------|-----------|
| CD4  |          | Zhongshan Golden Bridge Biotechnology | ZM-0418  | EP409     |
| CD8  |          | Zhongshan Golden Bridge Biotechnology | ZA-0508  | SP16      |
| Ki67 |          | Zhongshan Golden Bridge Biotechnology | ZM-0166  | UMAB107   |
| CD68 |          | Maixin Biotech                        | Kit-0026 | KP1       |

#### 1.2 Cell lines

| Name | Citation | Supplier | Cat no. | Passage no. | Authentication test method |
|------|----------|----------|---------|-------------|----------------------------|
|      |          |          |         |             |                            |

#### 1.3 Organisms

| Name | Citation | Supplier | Strain | Sex | Age | Overall n number |
|------|----------|----------|--------|-----|-----|------------------|
|      |          |          |        |     |     |                  |

#### 1.4 Sequence based reagents

| Name | Sequence | Supplier |
|------|----------|----------|
|      |          |          |

#### 1.5 Biological samples

| Description         | Source | Identifier |
|---------------------|--------|------------|
| Postmortem biopsies | Human  | 381346     |

|                     |       |        |
|---------------------|-------|--------|
| Postmortem biopsies | Human | 381356 |
|---------------------|-------|--------|

## 1.6 Deposited data

| Name of repository | Identifier | Link |
|--------------------|------------|------|
|                    |            |      |

## 1.7 Software

| Software name | Manufacturer | Version |
|---------------|--------------|---------|
|               |              |         |

## 1.8 Other (e.g. drugs, proteins, vectors etc.)

|  |  |  |
|--|--|--|
|  |  |  |
|  |  |  |

## 1.9 Please provide the details of the corresponding methods author for the manuscript:

**Name:** Jingmin Zhao; **Address:** No.100, Xisihuan Middle Road, Beijing, China, 100039; **Telephone:** +86-10-66933259/66933262; **Fax:** +86-10-63879532; **Email:** jmzhao302@163.com.

## 2.0 Please confirm for randomised controlled trials all versions of the clinical protocol are included in the submission. These will be published online as supplementary information.

|  |
|--|
|  |
|--|
